# Supplementary material
Source: PubMed Central journal article supplement (PMC4407235)

Table S1. Detailed list of the primer barcode sequences used for each of the samples in this study

| Age group   | Sample Name | Barcode sequence |
|-------------|-------------|------------------|
| 0 day old   | A01         | ATCACG           |
|             | A02         | CGATGT           |
|             | A03         | TTAGGC           |
|             | A04         | TGACCA           |
| 7 days old  | A05         | ACAGTG           |
|             | A06         | GCCAAT           |
|             | A07         | CAGATC           |
| 28 days old | A08         | GATCAG           |
|             | A09         | TAGCTT           |
|             | A10         | GGCTAC           |
| 42 days old | A11         | CTTGTA           |
|             | A12         | AGTCAA           |
|             | A13         | AGTTCC           |
|             | A14         | ATGTCA           |
| 70 days old | A15         | CCGTCC           |
|             | A16         | GTCCGC           |
|             | A17         | GTGAAA           |

Table S2. Primers used for qPCR

| <b>Primer's name</b>     | <b>Sequence (5' to 3')</b> | <b>Size (bp)</b> | <b>Reference</b> |
|--------------------------|----------------------------|------------------|------------------|
| Bacteria-F               | CGGCAACGAGCGCAACCC         | 146              | 1                |
| Bacteria-R               | CCATTGTAGCACGTGTGTAGCC     |                  |                  |
| <i>Prevotella</i> spp.-F | GGTTCTGAGAGGAAGGTCCCC      | 121              | 2                |
| <i>Prevotella</i> spp.-R | TCCTGCACGCTACTTGGCTG       |                  |                  |
| <i>Bacteroides</i> -F    | GAGAGGAAGGTCCCCCAC         | 109              | 3                |
| <i>Bacteroides</i> -R    | CGCTACTTGGCTGGTTCAG        |                  |                  |

### **Literature cited**

1. **Denman SE, McSweeney CS.** 2006. Development of a real-time PCR assay for monitoring anaerobic fungal and cellulolytic bacterial populations within the rumen. *FEMS Microbiol Ecol* **58**:572-282.
2. **Stevenson DM, Weimer PJ.** 2007. Dominance of *Prevotella* and low abundance of classical ruminal bacterial species in the bovine rumen revealed by relative quantification real-time PCR. *Appl Microbiol Biotechnol* **75**:165-174.
3. **Layton A, McKay L, Williams D, Garrett V, Gentry R, Saylor G.** 2006. Development of *Bacteroides* 16S rRNA gene TaqMan-based real-time PCR assays for estimation of total, human, and bovine fecal pollution in water. *Appl Environ Microbiol* **72**:4214-4224.

## Figure legends

Figure S1. Rarefaction curve (number of OTUs) of the ruminal epithelial bacteria at different ages in goats.

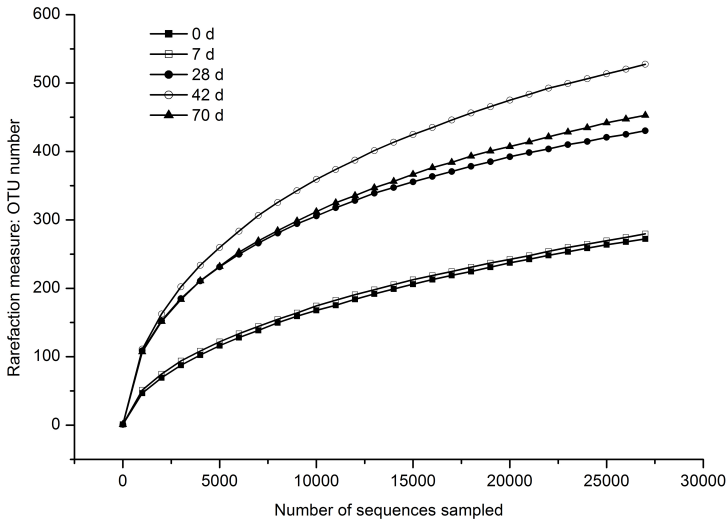

Supplement: AEM.00203-15_zam999116257so1.pdf [file AEM.00203-15_zam999116257so1.pdf]
